# Supplementary material
Source: Springer Nature journal article supplement (https://www.springermedizin.de/resource/supplementary/12914_2012_219_MOESM2_ESM.pdf/9537038)

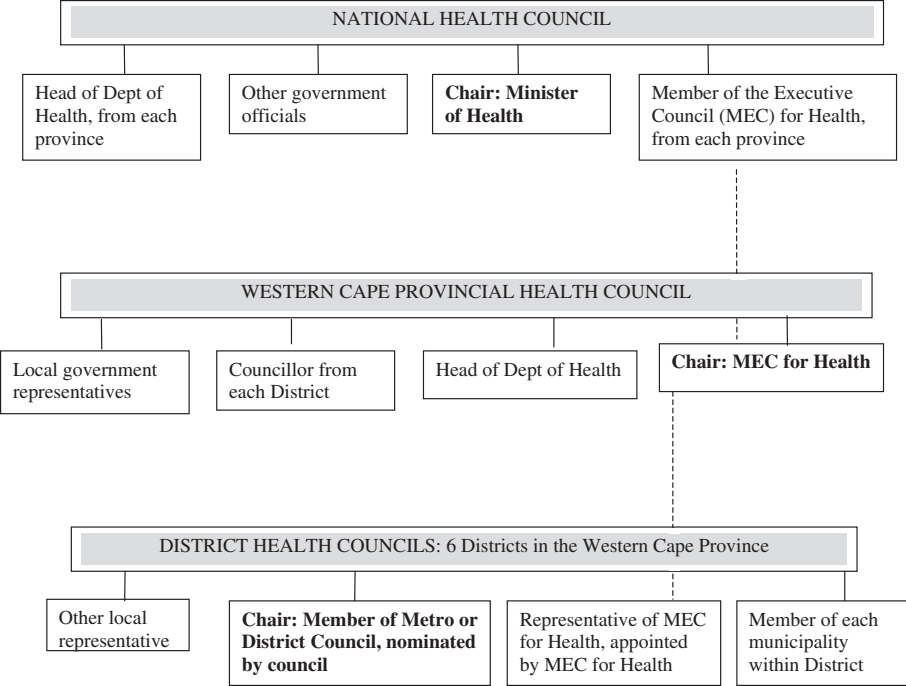

Supplement: MOESM2 [file 9537038]
